# Supplementary material for: Microbial plankton occurrence database in the North American Arctic region: synthesis of recent diversity of potentially toxic and harmful algae
Source: Copernicus journal article supplement (doi:10.5194/essd-2024-19), 2024-03-04
Supplement: Supplementary file 1 [file essd-2024-19-supplement.pdf]

1 **Additional Supporting Information**

2 **Database of phytoplankton species and other protists occurrence in North American Arctic: synthesis of recent**  
3 **diversity of toxic and harmful algae**

4 Nicolas Schiffrine<sup>1</sup>, Fatma Dhifallah<sup>1</sup>, Kaven Dionne<sup>1, a</sup>, Michel Poulin<sup>2</sup>, Sylvie Lessard<sup>1</sup>, André Rochon<sup>1</sup>, Michel Gosselin<sup>1</sup>

5 <sup>1</sup>Institut des sciences de la mer de Rimouski (ISMER), Université du Québec à Rimouski, Rimouski, QC G5L 3A1, Canada

6 <sup>2</sup>Recherche et collections, Musée canadien de la nature, C.P. 3443, Succ. D, Ottawa, ON K1P 6P4, Canada

7 <sup>a</sup>present address: Réseau Québec Maritime, Université du Québec à Rimouski, Rimouski, QC G5L 3A1, Canada

8 *Corresponding author:* Nicolas Schiffrine ([nicolas\\_schiffrine@uqar.ca](mailto:nicolas_schiffrine@uqar.ca))

9

10 **Supplementary figures**

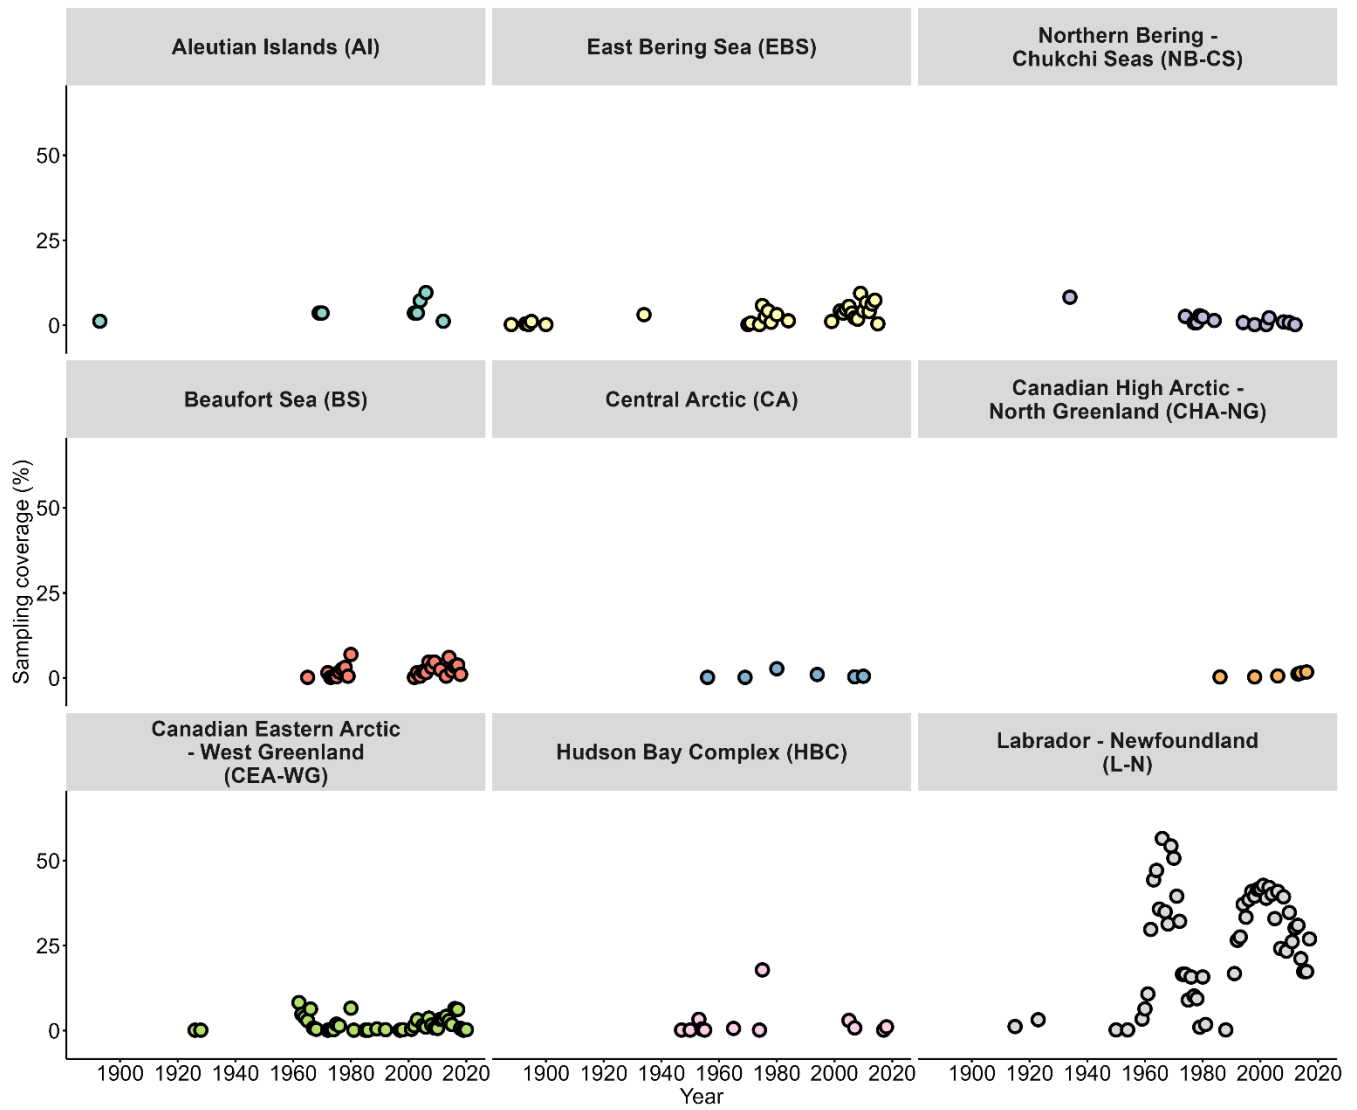

11

12 **Figure S1: Temporal variation of sampling coverage (%) for each Large Marine Ecosystem (LME) region. Abbreviations of the**  
13 **LME regions are in parentheses.**

14

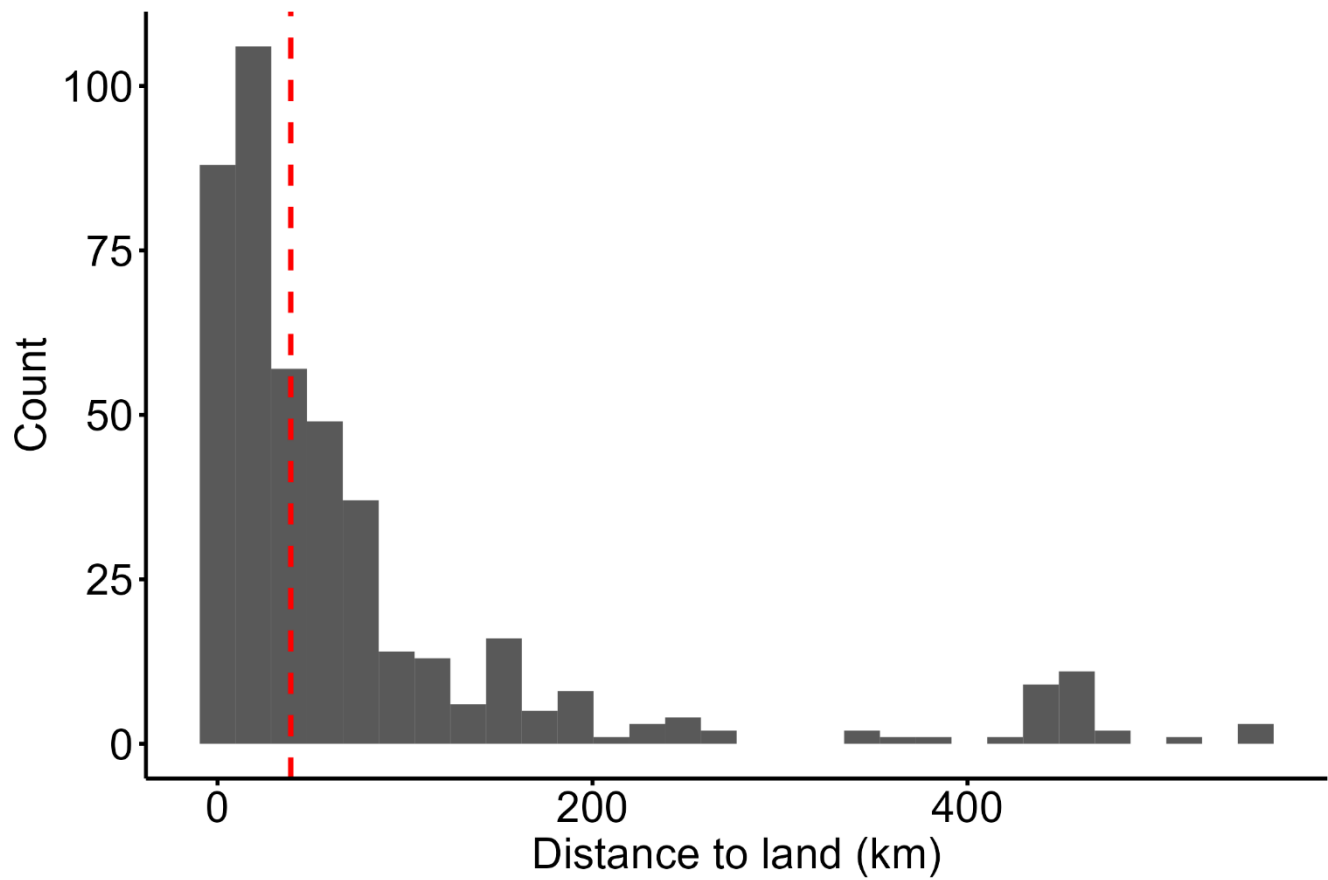

15

16 **Figure S2: Histogram of the distribution of distances to land (kilometers) for the sampled station in the Beaufort Sea (BS) region.**

17 **The red dashed line represents the median.**

18

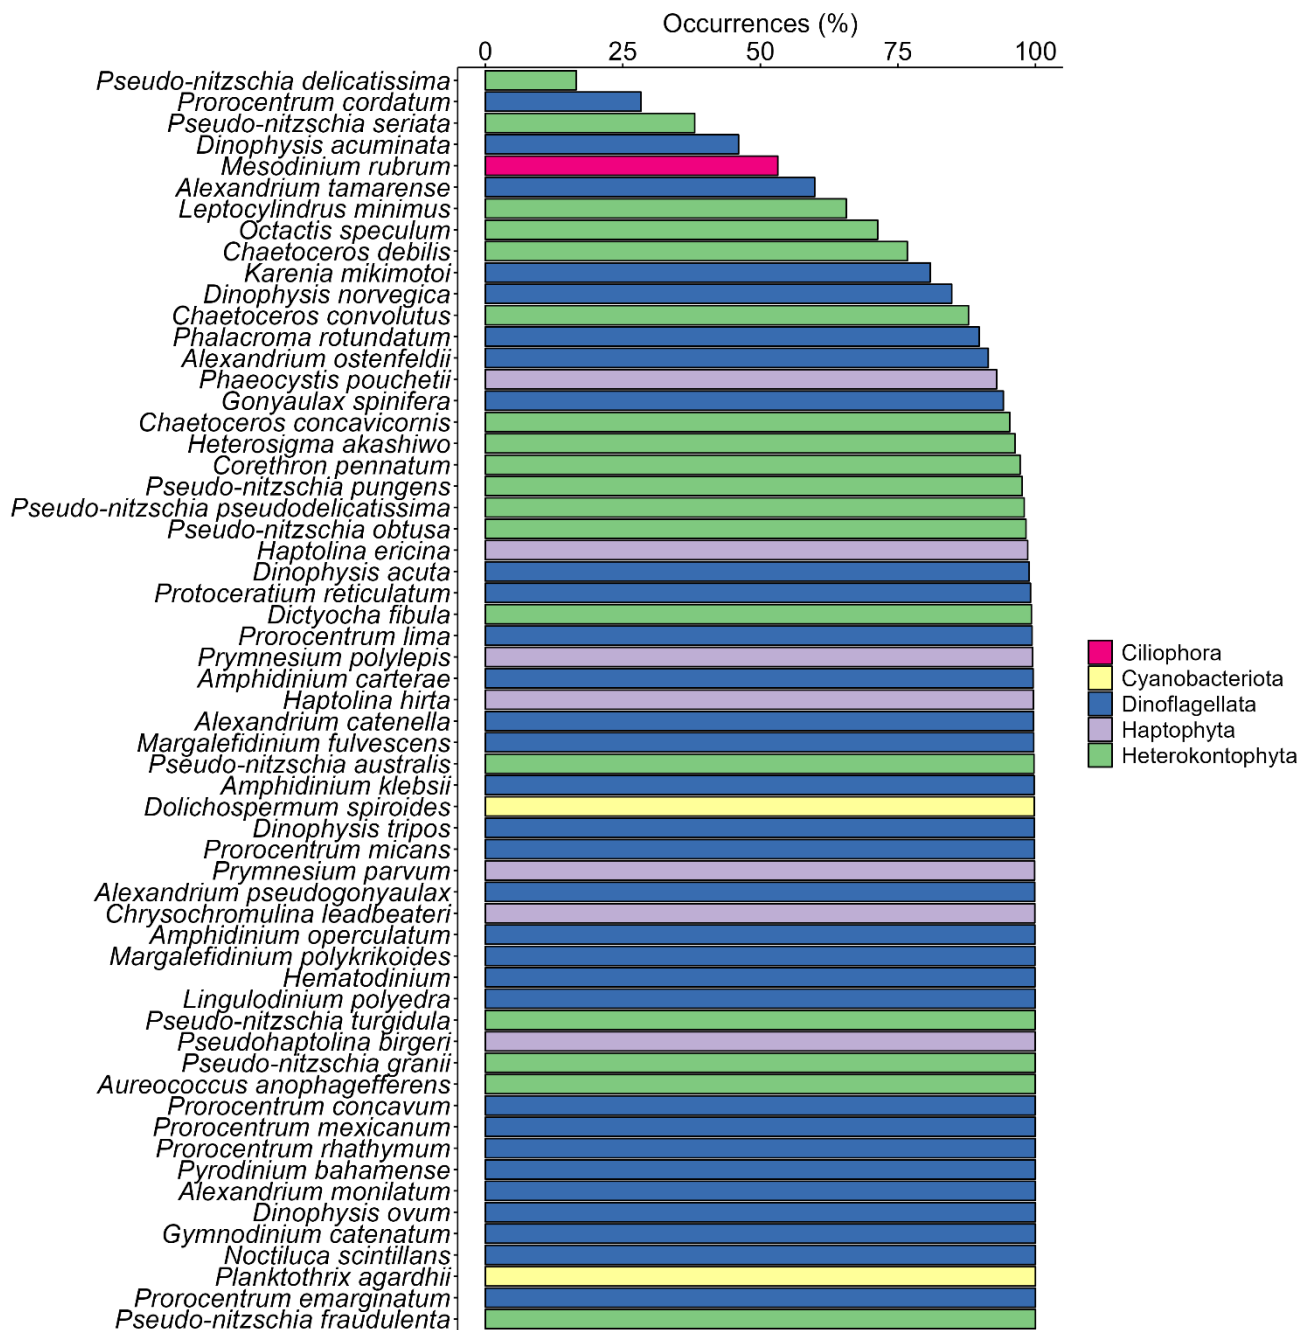

19

20 **Figure S3: Cumulative occurrences (%) of the HA taxa.**

21

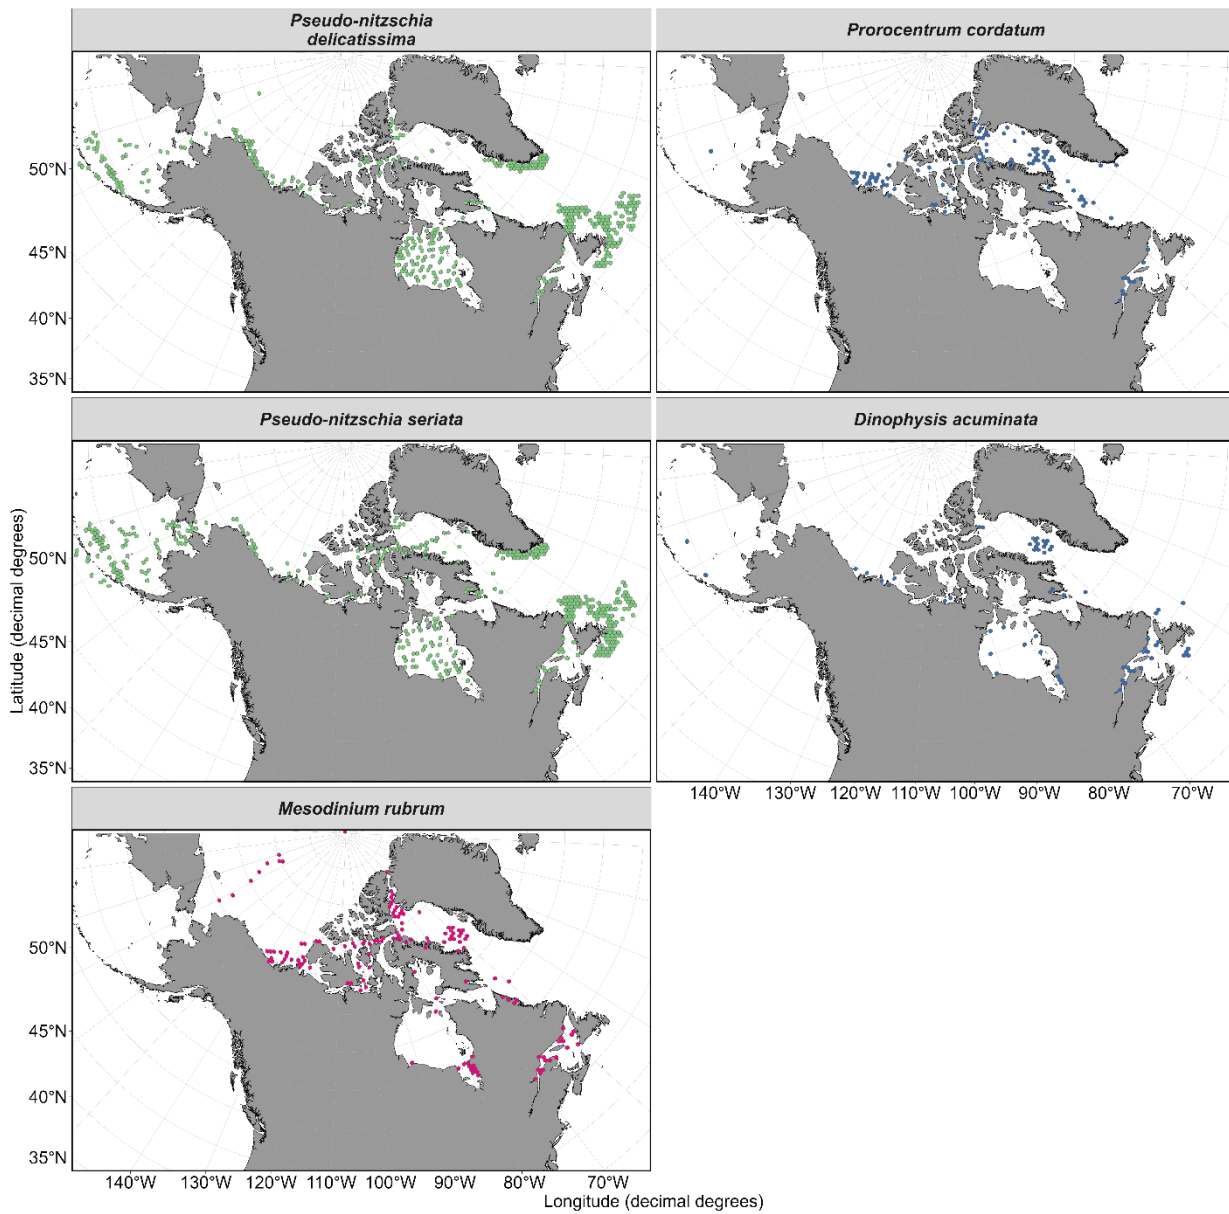

22

23 **Figure S4: Geographical distribution of the five most occurring HA species.**
